# Supplementary material
Source: PubMed Central journal article supplement (PMC2787348)
Supplement: supp_M109.056689_jbc.M109.056689-1.pdf [file supp_M109.056689_jbc.M109.056689-1.pdf]

Supplementary Table 1. Strains used in this study

|                    | Genotype                                      | Reference                      | Figures             |
|--------------------|-----------------------------------------------|--------------------------------|---------------------|
| wild-type (BY4742) | <i>MATα his3Δ1 leu2Δ0 lys2Δ0 ura3Δ0</i>       | Brachmann <i>et al.</i> , 1998 | 1BCD, 2AB, 4AB, 5AB |
| KB006              | <i>sdt1::KanMX</i>                            | Winzeler <i>et al.</i> , 1999  | 4AB                 |
| KB007              | <i>isn1::KanMX</i>                            | Winzeler <i>et al.</i> , 1999  | 4AB                 |
| KB067-1C           | <i>MATα sdt1::KanMX, isn1::KanMX</i>          | This study                     | 4AB                 |
| KB034-1B           | <i>Phm8::KanMX</i>                            | This study                     | data not shown      |
| KB048              | <i>Isn1-TAP (HIS3)</i>                        | Ref.                           | 6                   |
| KB055              | <i>MATα Isn1-TAP (HIS3) npt1::KanMX</i>       | This study                     | 6                   |
| PAB046             | <i>MATα pnp1::kanMX4 urh1::NAT</i>            | Belenky <i>et al.</i> , 2007   | 1B                  |
| PAB038             | <i>MATα nrk1::HIS3 pnp1::kanMX4 urh1::NAT</i> | Belenky <i>et al.</i> , 2007   | 1BCD, 2AB, 5A       |
| BY165-1D           | <i>MATα, qns1Δ::kanMX4</i>                    | Bieganowski and Brenner, 2004  | 1D                  |

Supplementary Table 2. NAD<sup>+</sup> metabolites in wild-type and NR/NAR non-salvaging strain *nrk1 urh1 pnp1* (Fig. 2A)

| Metabolite            | Nam         | NA   | NR           | NAR        | NMN         | NaMN        | NAD+          | NaAD      | NADH         | NADP       | NADPH     |
|-----------------------|-------------|------|--------------|------------|-------------|-------------|---------------|-----------|--------------|------------|-----------|
| wild-type             | 11.1 ± 0.9  | <0.5 | 14.9 ± 4.1   | 17.6 ± 5.0 | 93.8 ± 19.8 | 68.9 ± 12.3 | 630.7 ± 121.0 | 5.5 ± 1.1 | 197.5 ± 35.1 | 36.5 ± 8.2 | 1.3 ± 0.3 |
| <i>nrk1 pnp1 urh1</i> | 59.1 ± 13.5 | <0.5 | 121.8 ± 10.7 | 73.3 ± 9.1 | 36.2 ± 11.8 | 3.51 ± 0.9  | 359.7 ± 60.2  | <0.1      | 157.4 ± 44.5 | 36.0 ± 5.4 | 3.5 ± 0.5 |

Supplementary Table 3. Other nucleotides/nucleosides in wild-type and NAR/NR non-salvaging strain *nrk1 urh1 pnp1* (Fig. 2B)

| Metabolite            | Cyt       | Urd        | Ino          | CMP         | UMP          | IMP       |
|-----------------------|-----------|------------|--------------|-------------|--------------|-----------|
| wild-type             | 2.6 ± 0.7 | 16.4 ± 7.4 | 8.8 ± 1.4    | 41.6 ± 8.3  | 115.8 ± 24.6 | 7.8 ± 0.9 |
| <i>nrk1 pnp1 urh1</i> | 2.4 ± 0.4 | 32.1 ± 7.8 | 244.8 ± 34.4 | 56.9 ± 10.9 | 263.4 ± 38.2 | 7.8 ± 1.3 |

Supplementary Table 4. Multiple experiment effects of wild-type, *phm8*, *isn1*, *sdt1*, *isn1 sdt1* mutant strains

|                  | Experiment 1             |      | Experiment 2             |       | Experiment 3             |      | Experiment 4             |            |
|------------------|--------------------------|------|--------------------------|-------|--------------------------|------|--------------------------|------------|
|                  | n=1                      |      | n=1                      |       | n=2                      |      | n=3                      |            |
|                  | Intracellular Conc. (μM) |      | Intracellular Conc. (μM) |       | Intracellular Conc. (μM) |      | Intracellular Conc. (μM) |            |
|                  | NR                       | NAR  | NR                       | NAR   | NR                       | NAR  | NR                       | NAR        |
| wild-type        | 137.1                    | 33.7 | 48.4                     | 92.2  | 96.1                     | 23.7 | 14.9 ± 4.1               | 17.6 ± 5.0 |
| <i>phm8</i>      | 71.2                     | 26.4 | -                        | -     | -                        | -    | -                        | -          |
| <i>isn1</i>      | 29.2                     | 28.6 | -                        | -     | 20.5                     | 20.1 | 6.0 ± 1.1                | 7.8 ± 1.1  |
| <i>sdt1</i>      | 40.8                     | 4.7  | -                        | -     | 28.6                     | 3.3  | 4.0 ± 0.7                | 4.7 ± 0.5  |
| <i>isn1 sdt1</i> | 2.1                      | 0.1  | <0.1                     | <0.02 | 1.4                      | 0.1  | 3.5 ± 0.6                | 3.1 ± 0.5  |

Supplementary Table 5. NAD<sup>+</sup> metabolites in wild-type, *isn1*, *sdt1* and *isn1 sdt1* (Fig. 4A)

| Metabolite       | Nam        | NA   | NR         | NAR        | NMN          | NaMN        | NAD+          | NaAD      | NADH         | NADP       | NADPH     |
|------------------|------------|------|------------|------------|--------------|-------------|---------------|-----------|--------------|------------|-----------|
| wild-type        | 11.1 ± 0.9 | <0.5 | 14.9 ± 4.1 | 17.6 ± 5.0 | 93.8 ± 19.8  | 68.9 ± 12.3 | 630.7 ± 121.3 | 5.5 ± 1.1 | 197.5 ± 35.1 | 36.5 ± 8.2 | 1.3 ± 0.3 |
| <i>isn1</i>      | 33.5 ± 4.1 | <0.5 | 6.0 ± 1.1  | 7.8 ± 1.1  | 101.2 ± 16.7 | 30.7 ± 4.2  | 646.8 ± 82.6  | <0.1      | 386.9 ± 50.6 | 29.3 ± 5.8 | 4.3 ± 0.2 |
| <i>sdt1</i>      | 47.6 ± 3.5 | <0.5 | 4.0 ± 0.7  | 4.7 ± 0.5  | 76.2 ± 10.2  | 19.3 ± 2.5  | 797.3 ± 82.7  | <0.1      | 271.0 ± 30.0 | 39.2 ± 4.7 | 7.3 ± 1.0 |
| <i>sdt1 isn1</i> | 30.1 ± 4.3 | <0.5 | 3.5 ± 0.6  | 3.1 ± 0.5  | 72.4 ± 7.0   | 26.4 ± 1.2  | 676.5 ± 55.6  | <0.1      | 458.2 ± 31.4 | 38.4 ± 3.3 | 4.3 ± 0.9 |

Supplementary Table 6. Other nucleotides/nucleosides in wild-type, *isn1*, *sdt1* and *isn1 sdt1* (Fig. 4B)

| Metabolite       | Cyt       | Urd        | Ino       | CMP         | UMP          | IMP        |
|------------------|-----------|------------|-----------|-------------|--------------|------------|
| wild-type        | 2.6 ± 0.7 | 16.4 ± 7.4 | 8.8 ± 1.4 | 41.6 ± 8.3  | 115.8 ± 24.6 | 7.8 ± 0.9  |
| <i>isn1</i>      | 1.7 ± 0.2 | 6.7 ± 1.2  | 1.1 ± 0.1 | 52.7 ± 5.0  | 223.0 ± 20.5 | 41.6 ± 2.2 |
| <i>sdt1</i>      | 1.8 ± 0.2 | 6.1 ± 1.1  | 8.7 ± 1.1 | 57.3 ± 4.3  | 200.3 ± 23.1 | 5.7 ± 0.8  |
| <i>sdt1 isn1</i> | 1.5 ± 0.1 | 3.8 ± 0.3  | 1.0 ± 0.1 | 88.3 ± 11.9 | 238.0 ± 25.6 | 42.7 ± 2.8 |
